# Supplementary material
Source: PubMed Central journal article supplement (PMC4960478)
Supplement: Supp_Figure1.pdf [file Supp_Figure1.pdf]

## Supplementary Data

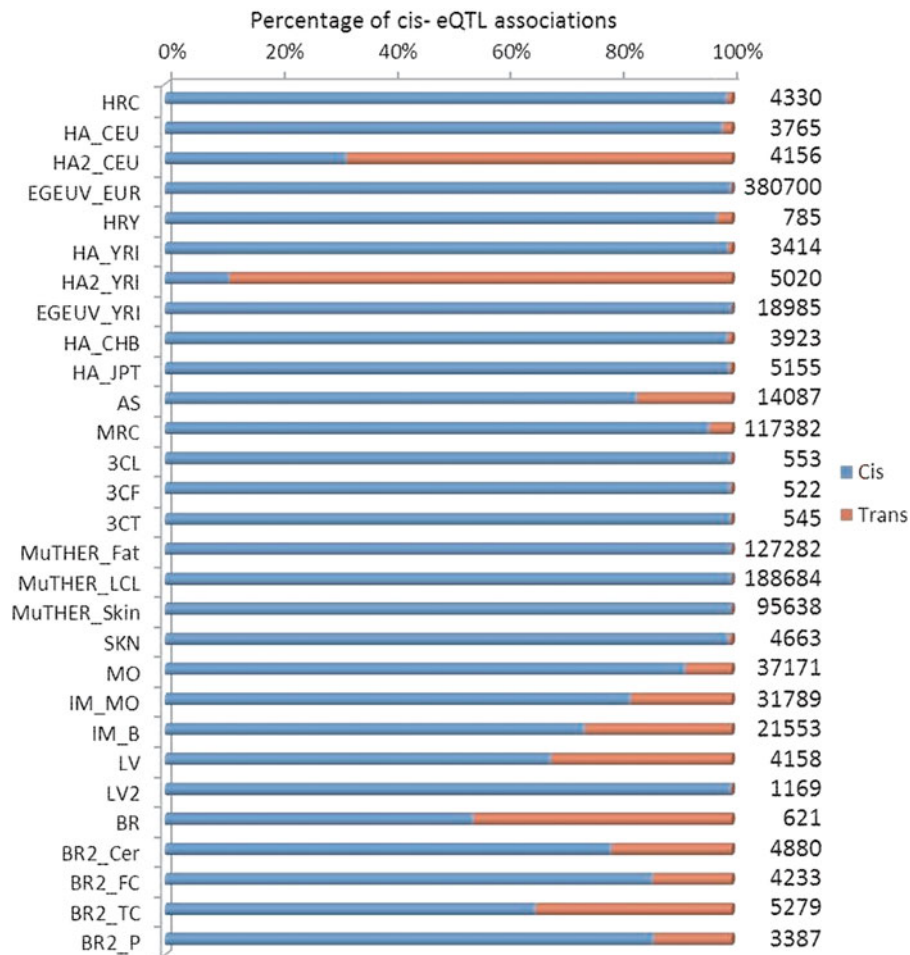

**SUPPLEMENTARY FIG. S1.** Fraction of cis- and trans-eQTL associations in each dataset. The number at the end of each *row* is the total number of eQTL associations. The fraction of associations classified as trans-eQTL in the HA2 study is much higher than others as a result of that study considering all associations out to 4 Mb, as opposed to the more usual 1 Mb. eQTL, expression quantitative trait locus.
