# Supplementary material
Source: PubMed Central journal article supplement (PMC4960478)
Supplement: Supp_Figure2.pdf [file Supp_Figure2.pdf]

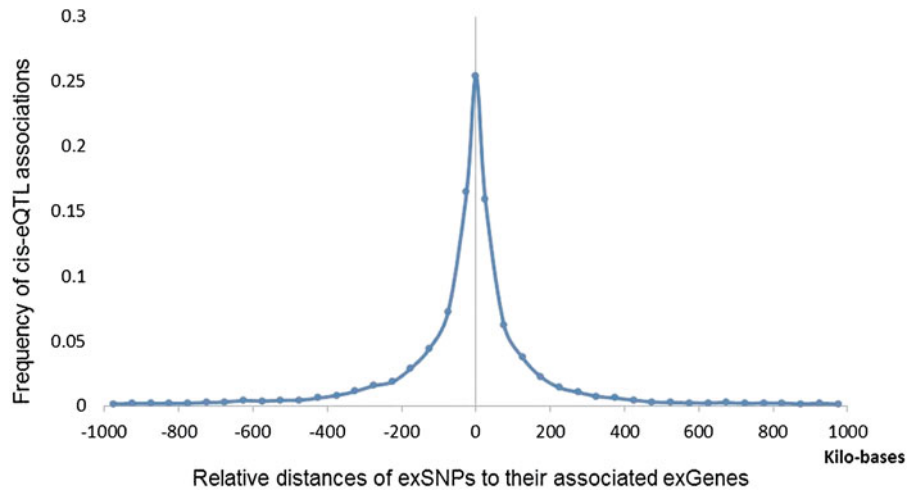

**SUPPLEMENTARY FIG. S2.** Distribution of distances between each cis-exSNP and the associated exGene. Most distances are relatively short—less than 200 kb.
