# Supplementary material
Source: PubMed Central journal article supplement (PMC4960478)
Supplement: Supp_Figure3.pdf [file Supp_Figure3.pdf]

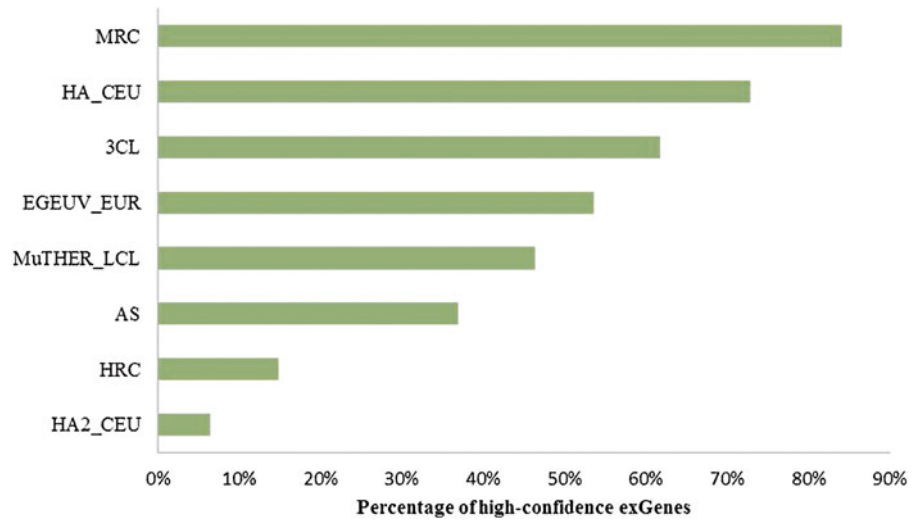

**SUPPLEMENTARY FIG. S3.** Approximate quality of each dataset, as reflected in the percentage of high-confidence exGenes relative to the LCL\_CEU integrated set, at an  $r^2 > 0.3$  LD threshold. LCL, lymphoblastoid cell line.
