# Supplementary material
Source: PubMed Central journal article supplement (PMC4960478)
Supplement: Supp_Table2.pdf [file Supp_Table2.pdf]

SUPPLEMENTARY TABLE S2. CLASSIFICATION OF EXPRESSION QUANTITATIVE TRAIT LOCUS STUDIES BY CELL TYPE AND POPULATION

| <i>Class</i>   | <i>Tissue</i> | <i>Population</i> | <i>Studies</i> | <i>Datasets</i>                                                                                            |
|----------------|---------------|-------------------|----------------|------------------------------------------------------------------------------------------------------------|
| AllCell_AllPop | All           | All               | 16             | All                                                                                                        |
| LCL_CEU        | LCL           | CEU               | 8              | HA_CEU, HA2_CEU, HRC, AS, MRC, 3CL, EGEUV_EUR, MuTHER_LCL                                                  |
| LCL_YRI        | LCL           | YRI               | 4              | HA_YRI, HA2_YRI, HRY, EGEUV_YRI                                                                            |
| LCL_ASN        | LCL           | ASN               | 1              | HA_CHB, HA_JPT                                                                                             |
| LCL            | LCL           | All               | 9              | HA_CEU, HA_YRI, HA_CHB, HA_JPT, HA2_CEU, HA2_YRI, HRC, HRY, AS, MRC, 3CL, EGEUV_EUR, EGEUV_YRI, MuTHER_LCL |
| Bcell          | B cell        | All               | 1              | IM_B                                                                                                       |
| Monocyte       | Monocyte      | All               | 2              | MO, IM_MO                                                                                                  |
| Tcell          | T cell        | All               | 1              | 3CT                                                                                                        |
| Brain          | Brain         | All               | 2              | BR, BR2_Cer, BR2_FC, BR2_TC, BR2_P                                                                         |
| Liver          | Liver         | All               | 2              | LV, LV2                                                                                                    |
| Skin           | Skin          | All               | 2              | SKN, MuTHER_Skin                                                                                           |
| Fibroblast     | Fibroblast    | All               | 1              | 3CF                                                                                                        |
| Fat            | Adipose       | All               | 1              | MuTHER_Fat                                                                                                 |

ASN indicates pooled CHB+JPT populations.  
LCL, lymphoblastoid cell line.
