# Supplementary material
Source: PubMed Central journal article supplement (PMC4960478)
Supplement: Supp_Table3.pdf [file Supp_Table3.pdf]

SUPPLEMENTARY TABLE S3. EXPRESSION QUANTITATIVE TRAIT LOCUS RELATIONSHIPS AND HIGH-CONFIDENCE EXPRESSION QUANTITATIVE TRAIT LOCUS RELATIONSHIPS IN EACH INTEGRATED SET

|                                 | $LD(r^2)$ | <i>AllCell_AllPop</i> | <i>LCL_CEU</i> | <i>LCL_YRI</i> | <i>LCL</i> | <i>Brain</i> | <i>Liver</i> | <i>Skin</i> | <i>Monocyte</i> |
|---------------------------------|-----------|-----------------------|----------------|----------------|------------|--------------|--------------|-------------|-----------------|
| Unique exSNPs                   |           | 548344                | 431758         | 23536          | 441971     | 9169         | 3588         | 84578       | 55943           |
| Unique exGenes                  |           | 15170                 | 7869           | 2725           | 8918       | 1171         | 4295         | 2616        | 7186            |
| Total unique eQTL relationships | 0.8       | 240785                | 190902         | 17110          | 192093     | 1939         | 4914         | 14419       | 53656           |
| HC unique eQTL relationships    | 0.8       | 18615                 | 9585           | 257            | 9237       | 21           | 393          | 153         | 3562            |
| HC unique exGenes               | 0.8       | 4252                  | 2079           | 203            | 2245       | 16           | 393          | 91          | 857             |
| Total unique eQTL relationships | 0.5       | 169031                | 140831         | 14688          | 140481     | 1468         | 4803         | 6597        | 43065           |
| HC unique eQTL relationships    | 0.5       | 8768                  | 3990           | 208            | 3931       | 16           | 393          | 91          | 2923            |
| HC unique exGenes               | 0.5       | 4252                  | 2079           | 203            | 2245       | 16           | 393          | 91          | 857             |
| Total unique eQTL relationships | 0.3       | 133658                | 114892         | 12892          | 113989     | 1390         | 4750         | 3999        | 34118           |
| HC unique eQTL relationships    | 0.3       | 5928                  | 2802           | 203            | 2905       | 16           | 393          | 91          | 2282            |
| HC unique exGenes               | 0.3       | 4252                  | 2079           | 203            | 2245       | 16           | 393          | 91          | 857             |

$LD(r^2)$  is the linkage disequilibrium threshold used for relating exSNPs. See text for dataset definitions. eQTL, expression quantitative trait locus; LD, linkage disequilibrium.
