# Supplementary material
Source: PubMed Central journal article supplement (PMC4960478)
Supplement: Supp_Table4.pdf [file Supp_Table4.pdf]

SUPPLEMENTARY TABLE S4. exGENES ASSOCIATED WITH HIGH-CONFIDENCE EXPRESSION QUANTITATIVE TRAIT LOCI IN THE ALLCELL\_ALLPOP INTEGRATED SET AT A 0.05 cM THRESHOLD FOR THE WELLCOME TRUST CASE CONTROL CONSORTIUM SEVEN DISEASES

| <i>Disease</i> | <i>Chromosome</i> | <i>Loci</i> | <i>exGenes</i>                                                                                             |
|----------------|-------------------|-------------|------------------------------------------------------------------------------------------------------------|
| BD             | 2                 | 2q11.2      | CIAO1, LIPT1, TSGA10, UNC50                                                                                |
| BD             | 2                 | 2q37.3      | ANKMY1                                                                                                     |
| BD             | 3                 | 3p21.1      | GLT8D1, GNL3, ITIH4, NT5DC2, TMEM110                                                                       |
| BD             | 3                 | 3p22        | CMTM8, LRRFIP2, TRANK1                                                                                     |
| BD             | 3                 | 3q27        | MCCC1                                                                                                      |
| BD             | 4                 | 4q22        | PPM1K                                                                                                      |
| BD             | 5                 | 5q15        | ANKRD32, MCTP1                                                                                             |
| BD             | 7                 | 7p22        | MAD1L1                                                                                                     |
| BD             | 8                 | 8q24.3      | SLC45A4                                                                                                    |
| BD             | 9                 | 9p13        | NUDT2                                                                                                      |
| BD             | 9                 | 9p22        | TTC39B                                                                                                     |
| BD             | 9                 | 9q33        | RALGPS1, RPL12, SLC2A8, ZNF79                                                                              |
| BD             | 11                | 11q13.2     | CCS, CTSF, LRFN4, RIN1                                                                                     |
| BD             | 11                | 11q24       | SPA17                                                                                                      |
| BD             | 12                | 12q13.1     | CACNB3                                                                                                     |
| BD             | 12                | 12q23       | CMKLR1                                                                                                     |
| BD             | 14                | 14q11.2     | HNRNPC, RPGRIP1                                                                                            |
| BD             | 14                | 14q32.3     | TDRD9                                                                                                      |
| BD             | 15                | 15q14       | C15orf53                                                                                                   |
| BD             | 15                | 15q25       | CTSH                                                                                                       |
| BD             | 16                | 16p12       | COG7, DCTN5, GGA2                                                                                          |
| BD             | 19                | 19p13.1     | ATP13A1, LPAR2, MAU2                                                                                       |
| BD             | 19                | 19q13.1     | LOC400684                                                                                                  |
| BD             | 19                | 19q13.2     | RABAC1                                                                                                     |
| BD             | 20                | 20p13       | CDC25B                                                                                                     |
| BD             | 20                | 20q13.1     | PARD6B                                                                                                     |
| CAD            | 1                 | 1p13.3      | CELSR2, PSRC1, SORT1                                                                                       |
| CAD            | 1                 | 1q21.3      | UBE2Q1                                                                                                     |
| CAD            | 2                 | 2q33        | FAM117B                                                                                                    |
| CAD            | 3                 | 3p25        | ANKRD28, COLQ                                                                                              |
| CAD            | 3                 | 3q22        | CEP70, FAIM                                                                                                |
| CAD            | 6                 | 6p21.3      | CCHCR1, DDR1, DEF6, DPCR1, HCG22, HCG27, HLA-B, HLA-C, HLA-DQB1, LST1, MICB, TCF19, TCP11, UHRF1BP1, VARS2 |
| CAD            | 6                 | 6q14        | FAM46A                                                                                                     |
| CAD            | 6                 | 6q25.3      | SLC22A3                                                                                                    |
| CAD            | 7                 | 7q22        | GPR22                                                                                                      |
| CAD            | 9                 | 9p21        | CDKN2B                                                                                                     |
| CAD            | 9                 | 9q34.2      | SURF1, SURF6                                                                                               |
| CAD            | 10                | 10q23.3     | LIPA                                                                                                       |
| CAD            | 10                | 10q24.3     | AS3MT, C10orf26, C10orf32, NT5C2, SFXN2, USMG5                                                             |
| CAD            | 11                | 11q22.3     | PDGFD                                                                                                      |
| CAD            | 11                | 11q23.3     | TAGLN                                                                                                      |
| CAD            | 11                | 11q24       | FOXRED1, ST3GAL4                                                                                           |
| CAD            | 12                | 12q24.1     | FAM109A, SH2B3, TMEM116                                                                                    |
| CAD            | 12                | 12q24.31    | C12orf43, SPPL3                                                                                            |
| CAD            | 15                | 15q25       | ADAMTS7, CTSH                                                                                              |
| CAD            | 17                | 17p11.2     | PEMT, RASD1                                                                                                |
| CAD            | 17                | 17p13       | SRR                                                                                                        |
| CAD            | 17                | 17q21.3     | ATP5G1, UBE2Z                                                                                              |
| CAD            | 19                | 19p13.2     | SMARCA4                                                                                                    |
| CD             | 1                 | 1p13.2      | AP4B1                                                                                                      |
| CD             | 1                 | 1p31.1      | DNAJB4, GIPC2, NEXN                                                                                        |
| CD             | 1                 | 1p31.3      | SLC35D1                                                                                                    |
| CD             | 1                 | 1p36.2      | PER3                                                                                                       |
| CD             | 1                 | 1q22        | ADAM15, MUC1, RIT1                                                                                         |
| CD             | 1                 | 1q23        | CD244, LY9, SLAMF7                                                                                         |
| CD             | 1                 | 1q32.1      | IL19                                                                                                       |
| CD             | 2                 | 2p16        | AHSA2, KIAA1841, LOC339803, PUS10                                                                          |
| CD             | 2                 | 2p23        | C2orf28, GPN1, KRTCAP3, SLC5A6                                                                             |

(continued)

SUPPLEMENTARY TABLE S4. (CONTINUED)

| <i>Disease</i> | <i>Chromosome</i> | <i>Loci</i> | <i>exGenes</i>                                                                                                                                                                                                                    |
|----------------|-------------------|-------------|-----------------------------------------------------------------------------------------------------------------------------------------------------------------------------------------------------------------------------------|
| CD             | 2                 | 2q37.1      | DGKD, SP110, SP140                                                                                                                                                                                                                |
| CD             | 3                 | 3p21.3      | AMT, HYAL3, IP6K2, KLHDC8B, NCKIPSD, NICN1, P4HTM, RBM6, UBA7, USP4, WDR6                                                                                                                                                         |
| CD             | 4                 | 4q24        | BANK1                                                                                                                                                                                                                             |
| CD             | 5                 | 5p13.1      | PTGER4                                                                                                                                                                                                                            |
| CD             | 5                 | 5q15        | ERAP1, ERAP2, LNPEP                                                                                                                                                                                                               |
| CD             | 5                 | 5q31.1      | PDLIM4, SLC22A4, SLC22A5                                                                                                                                                                                                          |
| CD             | 5                 | 5q31.3      | FGF1, NDFIP1                                                                                                                                                                                                                      |
| CD             | 5                 | 5q35.2      | CPEB4                                                                                                                                                                                                                             |
| CD             | 6                 | 6p21.3      | AIF1, ATP6V1G2, CCHCR1, CLIC1, CSNK2B, DOM3Z, GPANK1, HCG22, HCG27, HLA-B, HLA-C, HLA-DOB, HLA-DPB1, HLA-DQA1, HLA-DQA2, HLA-DQB1, HLA-DQB2, HLA-DRB1, HLA-DRB4, HLA-DRB5, HSPA1B, LST1, LY6G5C, MICB, PRRC2A, TAP2, TCF19, VARS2 |
| CD             | 6                 | 6q22.3      | THEMIS                                                                                                                                                                                                                            |
| CD             | 6                 | 6q25.3      | RSPH3                                                                                                                                                                                                                             |
| CD             | 6                 | 6q27        | FGFR1OP, RNASET2, RPS6KA2                                                                                                                                                                                                         |
| CD             | 7                 | 7p15.2      | SKAP2                                                                                                                                                                                                                             |
| CD             | 8                 | 8q21.3      | RIPK2                                                                                                                                                                                                                             |
| CD             | 9                 | 9p24        | JAK2                                                                                                                                                                                                                              |
| CD             | 9                 | 9q34.3      | CARD9, DNLZ, INPP5E, SDCCAG3                                                                                                                                                                                                      |
| CD             | 10                | 10p11.2     | CREM                                                                                                                                                                                                                              |
| CD             | 10                | 10q21.1     | CISD1                                                                                                                                                                                                                             |
| CD             | 10                | 10q21.2     | ADO                                                                                                                                                                                                                               |
| CD             | 11                | 11q12       | C11orf10, FADS1, FADS2                                                                                                                                                                                                            |
| CD             | 11                | 11q13.1     | CCDC88B, FKBP2, PRDX5, RPS6KA4, TRMT112, TRPT1                                                                                                                                                                                    |
| CD             | 11                | 11q13.5     | C11orf30                                                                                                                                                                                                                          |
| CD             | 12                | 12q12       | SLC2A13                                                                                                                                                                                                                           |
| CD             | 13                | 13q14.1     | LACC1, TNFSF11                                                                                                                                                                                                                    |
| CD             | 14                | 14q24.1     | ZFP36L1                                                                                                                                                                                                                           |
| CD             | 14                | 14q31       | GALC, GPR65                                                                                                                                                                                                                       |
| CD             | 15                | 15q14       | RASGRP1                                                                                                                                                                                                                           |
| CD             | 16                | 16p11.2     | APOBR, CCDC101, EIF3C, SPNS1, TUFM                                                                                                                                                                                                |
| CD             | 16                | 16q12.1     | NOD2, SNX20                                                                                                                                                                                                                       |
| CD             | 17                | 17q12       | GSDMA, GSDMB, ORMDL3, ZPBP2                                                                                                                                                                                                       |
| CD             | 17                | 17q21.2     | CNTNAP1                                                                                                                                                                                                                           |
| CD             | 19                | 19p13.2     | CDC37, ICAM3, ICAM4                                                                                                                                                                                                               |
| CD             | 19                | 19p13.3     | GPX4                                                                                                                                                                                                                              |
| CD             | 20                | 20q13.3     | STMN3                                                                                                                                                                                                                             |
| CD             | 21                | 21q22.1     | GART, IFNGR2, ITSN1, TMEM50B                                                                                                                                                                                                      |
| CD             | 22                | 22q11.2     | UBE2L3                                                                                                                                                                                                                            |
| CD             | 22                | 22q12.2     | MTMR3, UQCR10                                                                                                                                                                                                                     |
| CD             | 22                | 22q13.1     | PDGFB, SYNGR1                                                                                                                                                                                                                     |
| CD             | 22                | 22q13.2     | CCDC134, EP300, L3MBTL2, MEI1, PMM1                                                                                                                                                                                               |
| HT             | 1                 | 1p13.2      | ST7L                                                                                                                                                                                                                              |
| HT             | 4                 | 4q24        | SLC39A8                                                                                                                                                                                                                           |
| HT             | 6                 | 6p21.3      | AIF1, ATP6V1G2, CSNK2B, DOM3Z, GPANK1, HCG27, HLA-C, HLA-DQA1, HLA-DQB1, HLA-DRB1, HLA-DRB5, HSPA1B, LST1, LY6G5C, MICB                                                                                                           |
| HT             | 6                 | 6p22.2      | BTN3A2, BTN3A3, HIST1H2BD, TRIM38                                                                                                                                                                                                 |
| HT             | 8                 | 8p23.1      | XKR6                                                                                                                                                                                                                              |
| HT             | 12                | 12q21.3     | GALNT4                                                                                                                                                                                                                            |
| HT             | 15                | 15q26.1     | FES                                                                                                                                                                                                                               |
| HT             | 20                | 20q13.3     | CTSZ, TH1L                                                                                                                                                                                                                        |
| RA             | 1                 | 1p13.2      | AP4B1                                                                                                                                                                                                                             |
| RA             | 1                 | 1p36.3      | MMEL1, TNFRSF14                                                                                                                                                                                                                   |
| RA             | 2                 | 2p14        | SPRED2                                                                                                                                                                                                                            |
| RA             | 2                 | 2p16        | AHSA2, LOC339803, PUS10                                                                                                                                                                                                           |
| RA             | 2                 | 2q11.2      | AFF3                                                                                                                                                                                                                              |
| RA             | 4                 | 4p15.2      | ANAPC4, ZCCHC4                                                                                                                                                                                                                    |
| RA             | 5                 | 5q21        | PAM, PPIP5K2                                                                                                                                                                                                                      |

(continued)

SUPPLEMENTARY TABLE S4. (CONTINUED)

| <i>Disease</i> | <i>Chromosome</i> | <i>Loci</i> | <i>exGenes</i>                                                                                                                                                                            |
|----------------|-------------------|-------------|-------------------------------------------------------------------------------------------------------------------------------------------------------------------------------------------|
| RA             | 6                 | 6p21.3      | HCG22, HCG27, HLA-B, HLA-C, HLA-DOB, HLA-DPB1, HLA-DQA1, HLA-DQA2, HLA-DQB1, HLA-DQB2, HLA-DRA, HLA-DRB1, HLA-DRB4, HLA-DRB5, HLA-DRB6, LOC285835, LST1, MICB, PRRC2A, PSMB9, TAP2, VARS2 |
| RA             | 6                 | 6p22.1      | BTN3A2, GABBR1, HCG4, HCG4B, HLA-A, HLA-F, HLA-G, VARS2, ZFP57, ZNRD1                                                                                                                     |
| RA             | 6                 | 6q27        | FGFR1OP, RNASET2, RPS6KA2                                                                                                                                                                 |
| RA             | 7                 | 7q32        | IRF5, TNPO3                                                                                                                                                                               |
| RA             | 8                 | 8p23.1      | BLK, FAM167A, FDFT1, XKR6                                                                                                                                                                 |
| RA             | 9                 | 9p13        | NUDT2                                                                                                                                                                                     |
| RA             | 9                 | 9q33        | C5, GSN, MEGF9                                                                                                                                                                            |
| RA             | 12                | 12q13.3     | METTL21B, TSFM                                                                                                                                                                            |
| RA             | 12                | 12q24.1     | FAM109A, SH2B3, TMEM116                                                                                                                                                                   |
| RA             | 14                | 14q24.3     | BATF                                                                                                                                                                                      |
| RA             | 17                | 17q12       | GSDMA, GSDMB, ORMDL3, ZPBP2                                                                                                                                                               |
| RA             | 20                | 20q13.1     | CD40, PLTP                                                                                                                                                                                |
| RA             | 21                | 21q22.3     | UBASH3A                                                                                                                                                                                   |
| RA             | 22                | 22q12.3     | IL2RB                                                                                                                                                                                     |
| T1D            | 1                 | 1p13.2      | AP4B1                                                                                                                                                                                     |
| T1D            | 1                 | 1p31.3      | PGM1                                                                                                                                                                                      |
| T1D            | 1                 | 1q32.1      | IL19                                                                                                                                                                                      |
| T1D            | 2                 | 2p23        | ADCY3, POMC                                                                                                                                                                               |
| T1D            | 2                 | 2q11.2      | AFF3                                                                                                                                                                                      |
| T1D            | 6                 | 6p21.3      | HCG27, HLA-DOB, HLA-DPB1, HLA-DQA1, HLA-DQA2, HLA-DQB1, HLA-DQB2, HLA-DRB1, HLA-DRB4, HLA-DRB5, PRRC2A, TAP2                                                                              |
| T1D            | 7                 | 7p15.2      | SKAP2                                                                                                                                                                                     |
| T1D            | 8                 | 8q24.1      | TNFRSF11B                                                                                                                                                                                 |
| T1D            | 12                | 12p13.3     | CLEC2B, CLEC2D, CLECL1                                                                                                                                                                    |
| T1D            | 12                | 12q13.2     | RPS26, SPRYD4, STAT2, SUOX                                                                                                                                                                |
| T1D            | 12                | 12q24.1     | ALDH2, FAM109A, SH2B3, TMEM116                                                                                                                                                            |
| T1D            | 14                | 14q24.1     | ZFP36L1                                                                                                                                                                                   |
| T1D            | 15                | 15q14       | RASGRP1                                                                                                                                                                                   |
| T1D            | 15                | 15q25       | CTSH                                                                                                                                                                                      |
| T1D            | 16                | 16p11.2     | APOBR, CCDC101, EIF3C, SPNS1, TUFM                                                                                                                                                        |
| T1D            | 16                | 16p13.1     | DEXI, RMI2                                                                                                                                                                                |
| T1D            | 16                | 16q23       | CFDP1                                                                                                                                                                                     |
| T1D            | 17                | 17q12       | GSDMA, GSDMB, ORMDL3, ZPBP2                                                                                                                                                               |
| T1D            | 17                | 17q21.2     | CCR7, SMARCE1                                                                                                                                                                             |
| T1D            | 19                | 19p13.2     | CDC37, ICAM3, ICAM4                                                                                                                                                                       |
| T1D            | 19                | 19q13.3     | FKRP, PRKD2, STRN4                                                                                                                                                                        |
| T1D            | 21                | 21q22.3     | UBASH3A                                                                                                                                                                                   |
| T1D            | 22                | 22q12.2     | MTMR3, UQCR10                                                                                                                                                                             |
| T1D            | 22                | 22q12.3     | C1QTNF6                                                                                                                                                                                   |
| T2D            | 2                 | 2q36        | IRS1                                                                                                                                                                                      |
| T2D            | 3                 | 3p25        | PPARG                                                                                                                                                                                     |
| T2D            | 4                 | 4q27        | CCNA2, EXOSC9                                                                                                                                                                             |
| T2D            | 6                 | 6p21.3      | HLA-DOB, HLA-DPB1, HLA-DQA1, HLA-DQA2, HLA-DQB1, HLA-DQB2, HLA-DRB1, HLA-DRB5, TAP2                                                                                                       |
| T2D            | 8                 | 8q22.1      | TP53INP1                                                                                                                                                                                  |
| T2D            | 9                 | 9p21        | CDKN2B                                                                                                                                                                                    |
| T2D            | 10                | 10p13       | CAMK1D                                                                                                                                                                                    |
| T2D            | 11                | 11p15.1     | B7H6, NUCB2, SNORD14A                                                                                                                                                                     |
| T2D            | 11                | 11q13.4     | STARD10                                                                                                                                                                                   |
| T2D            | 12                | 12q13.1     | CERS5, DIP2B, SLC11A2, TFPC2                                                                                                                                                              |
| T2D            | 12                | 12q24.31    | C12orf43                                                                                                                                                                                  |
| T2D            | 15                | 15q24       | PSTPIP1, TSPAN3                                                                                                                                                                           |
| T2D            | 15                | 15q26.1     | HDCC3, RCCD1, UNC45A                                                                                                                                                                      |

BD, bipolar disorder; CAD, coronary artery disease; CD, Crohn's disease; HT, hypertension; RA, rheumatoid arthritis; T1D, type 1 diabetes; T2D, type 2 diabetes.
